# Supplementary material for: Superhydrophilic multifunctional nanotextured titanium dental implants: in vivo short and long-term response in a porcine model
Source: Royal Society of Chemistry journal article supplement (doi:10.1039/d1bm01223a), 2021-12-03
Supplement: d1bm01223a1.pdf [file d1bm01223a1.pdf]

## Supporting Information (SI)

### **Superhydrophilic Multifunctional Nanotextured Titanium Dental Implants:**

#### **In Vivo Short and Long-term Response in a Porcine Model**

Anil Mathew, Shilpa Abraham, Shamlin Stephen, Anna Serene Babu, Siddaramana G Gowd,

Vivek Vinod, Raja Biswas, Manitha B Nair, A K K Unni and Deepthy Menon\*

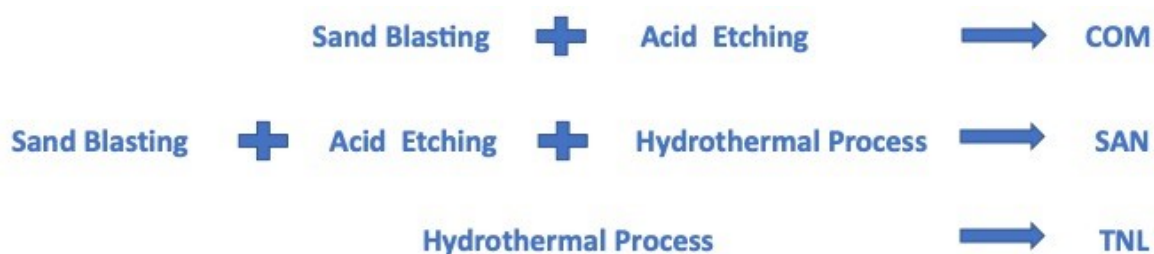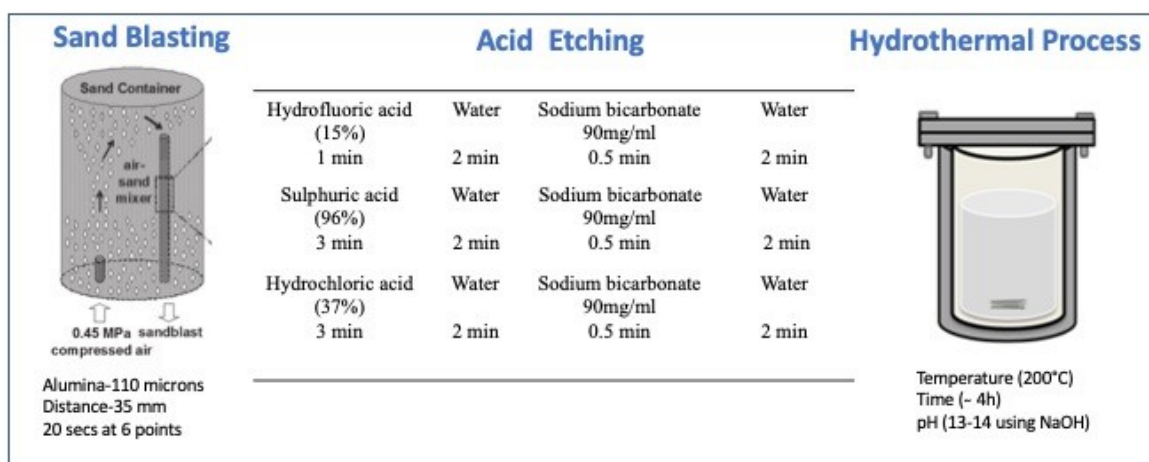

**Figure S1: Schematic of the different processing steps involved in fabricating COM, SAN, TNL samples**

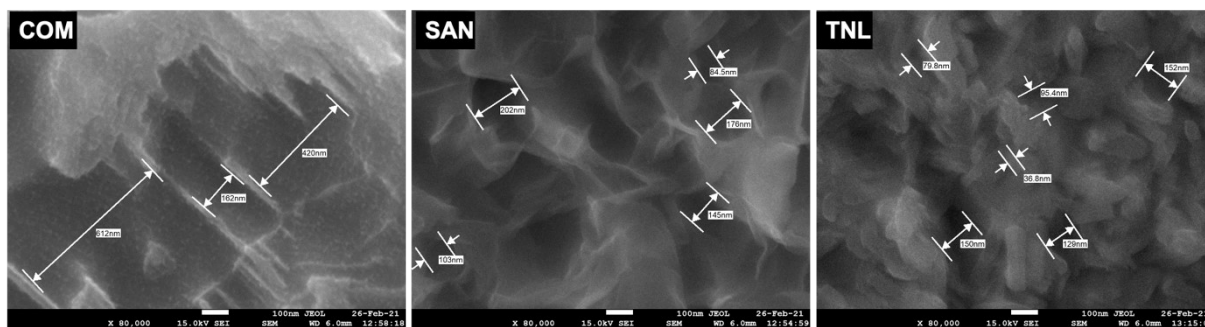

**Figure S2: High magnification SEM images (80,000X) of COM, SAN, TNL obtained on Titanium plates**

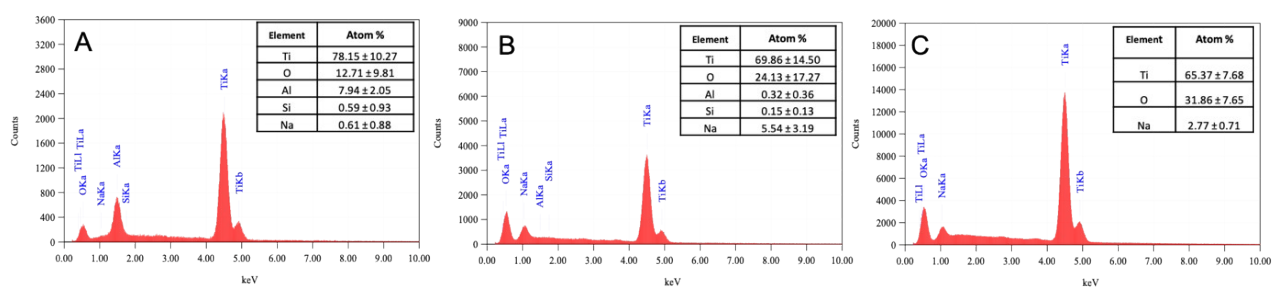

**Figure S3: EDS Spectra of (A) COM, (B) SAN and (C) TNL samples. Inset shows the atomic percentage of individual elements present on the samples**



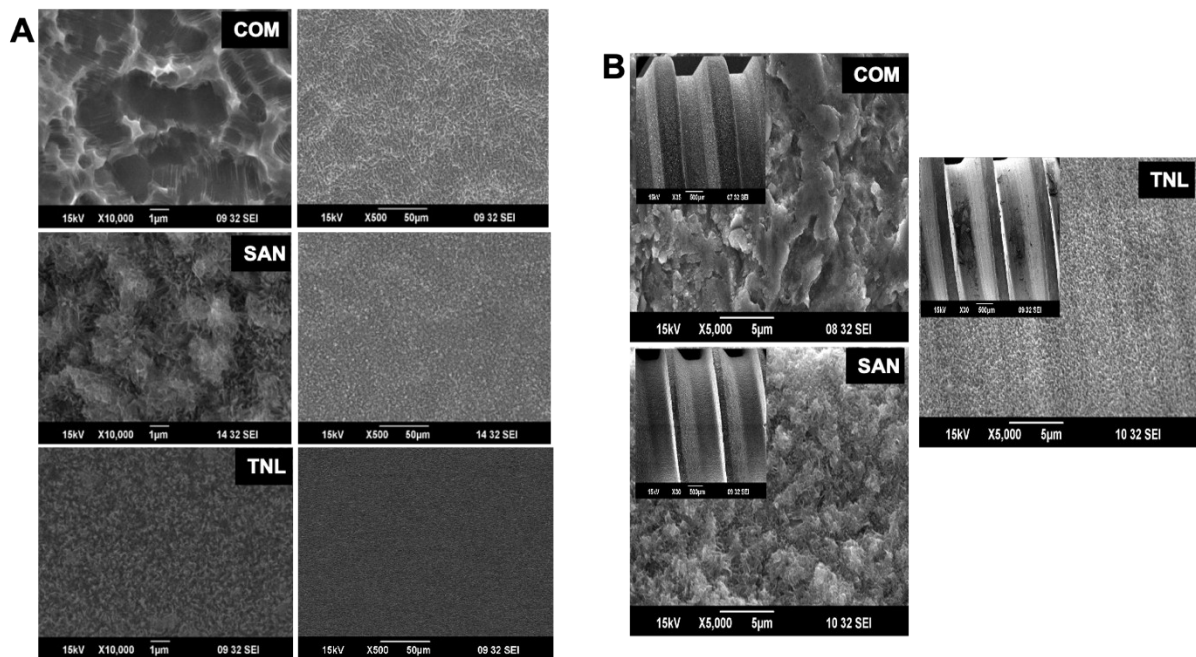

**Figure S6: (A) COM, SAN and TNL samples after ion leaching experiments for a duration of 8 weeks and (B) SEM images of ex vivo COM, SAN and TNL implants retrieved from the osteotomy sites after implantation, showing stability of the surface structures**

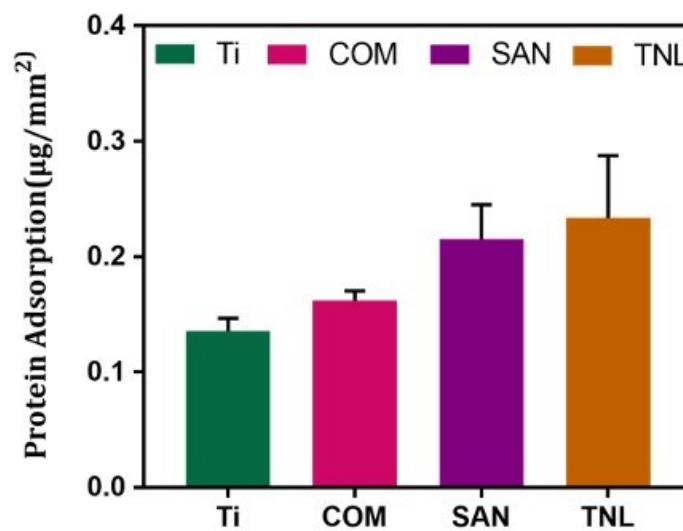

**Figure S7. Protein adsorption on polished Ti, COM, SAN and TNL samples after 1 h of incubation with Fetal Bovine Serum, measured by BCA assay.**

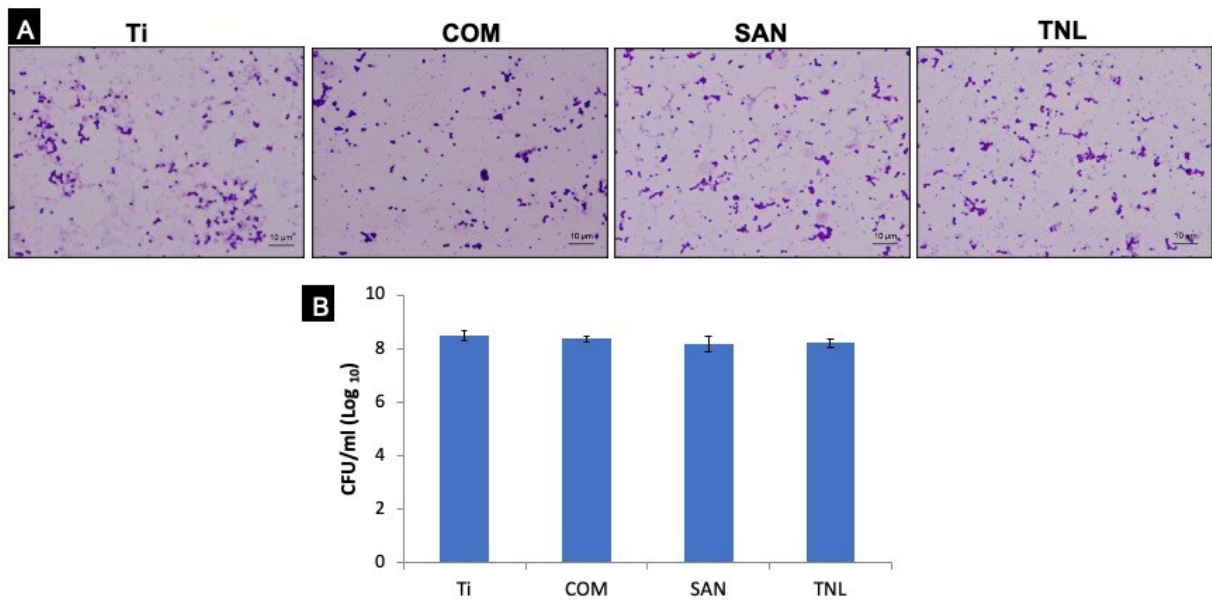

**Figure S8. (A) Gram staining showing no significant anti-bacterial activity on polished Ti, COM, SAN and TNL samples and (B) Anti-bacterial activity plot showing the total number of bacteria on different samples after 48 h.**

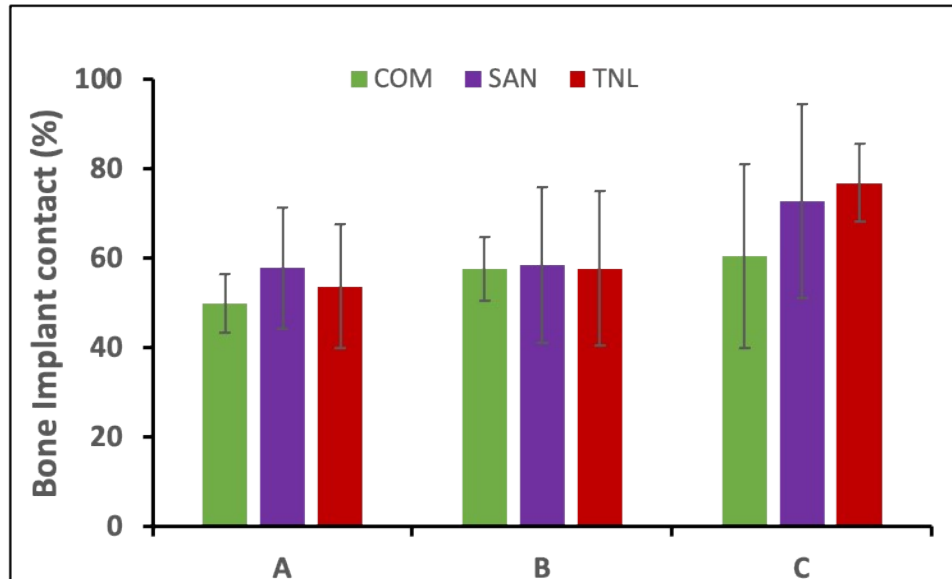

**Figure S9: Graph representing the variations in percentage bone implant contact (BIC) of the three implants at time points A (pre-loaded), B and C (loaded)**

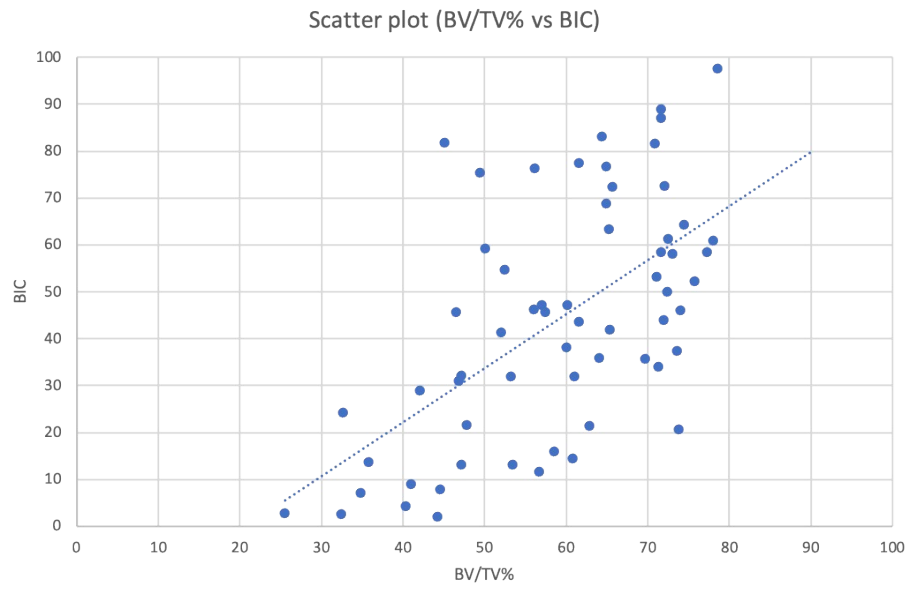

**Figure S10: Correlation analysis of the results of  $\mu$ -CT (BV/TV value) and histology (BIC values)**

**Table S1: Acid etching protocol for indigenous blasted etched surface**

|         |                         |       |                            |       |
|---------|-------------------------|-------|----------------------------|-------|
| Etchant | Hydrofluoric acid (15%) | Water | Sodium bicarbonate 90mg/ml | Water |
| Time    | 1 min                   | 2 min | 0.5 min                    | 2 min |
| Etchant | Sulphuric acid (96%)    | Water | Sodium bicarbonate 90mg/ml | Water |
| Time    | 3 min                   | 2 min | 0.5 min                    | 2 min |
| Etchant | Hydrochloric acid (37%) | Water | Sodium bicarbonate 90mg/ml | Water |
| Time    | 3 min                   | 2 min | 0.5 min                    | 2 min |

**Table S2. Chemical composition of fresh and aged COM, SAN and TNL surfaces obtained by XPS analysis**

| Sample         | C content (C 1s)<br>Atomic Conc % | O content (O 1s)<br>Atomic Conc % | Ti content (Ti 2p)<br>Atomic Conc % |
|----------------|-----------------------------------|-----------------------------------|-------------------------------------|
| Ti - fresh     | 36.98                             | 51.79                             | 11.23                               |
| Ti – 6 months  | 61.86                             | 32.72                             | 5.42                                |
| COM - fresh    | 61.45                             | 30.40                             | 8.15                                |
| COM – 6 months | 52.44                             | 43.80                             | 3.76                                |
| SAN - fresh    | 24.20                             | 58.44                             | 17.36                               |
| SAN – 6 months | 26.28                             | 59.21                             | 14.51                               |
| TNL - fresh    | 25.95                             | 57.52                             | 16.53                               |
| TNL – 6 months | 30.66                             | 53.26                             | 16.08                               |

**Table S3: Bone Implant contact of COM, SAN and TNL at different time points measured by histomorphometry, \*p< 0.05 is considered statistically significant.**

| <b>Time point</b> | <b>Group</b> | <b>N</b> | <b>Mean</b> | <b>Median</b> | <b>p value</b> |
|-------------------|--------------|----------|-------------|---------------|----------------|
| <b>14 days</b>    | COM          | 2        | 2.57±0.72   | 2.57          | 0.153          |
|                   | SAN          | 3        | 7.96±1.03   | 7.81          |                |
|                   | TNL          | 2        | 7.18±3.45   | 7.18          |                |
| <b>28 days</b>    | COM          | 2        | 11.90±6.97  | 11.90         | 0.368          |
|                   | SAN          | 2        | 12.41±0.97  | 12.41         |                |
|                   | TNL          | 2        | 22.72±11.71 | 22.72         |                |
| <b>Group A</b>    | COM          | 4        | 49.84±6.61  | 50.17         | 0.779          |
|                   | SAN          | 4        | 57.74±13.50 | 58.28         |                |
|                   | TNL          | 6        | 53.62±13.89 | 48.61         |                |
| <b>Group B</b>    | COM          | 4        | 57.43±7.14  | 59.64         | 0.736          |
|                   | SAN          | 5        | 58.55±17.43 | 54.81         |                |
|                   | TNL          | 4        | 57.61±17.28 | 52.07         |                |
| <b>Group C</b>    | COM          | 5        | 60.33±20.54 | 59.23         | 0.309          |
|                   | SAN          | 3        | 72.70±21.69 | 61.95         |                |
|                   | TNL          | 4        | 76.76±8.72  | 74.57         |                |

**Table S4: Table representing the variations in (A) bone volume percentage – BV/TV (B) mineral density of region of interest – BMD (au) and (C) tissue mineral density of the three different implants at all time points obtained from micro CT analysis. \*p< 0.05 is considered statistically significant.**

**Table S4A**

| <b>Time point</b> | <b>Group</b> | <b>N</b> | <b>Mean±SD</b> | <b>Median</b> | <b>p value</b> |
|-------------------|--------------|----------|----------------|---------------|----------------|
| <b>14 days</b>    | COM          | 2        | 40.04±5.96     | 40.04         | 0.555          |
|                   | SAN          | 3        | 43.99±2.73     | 44.54         |                |
|                   | TNL          | 2        | 42.24±0.31     | 42.24         |                |
| <b>28 days</b>    | COM          | 2        | 33.73±1.55     | 33.73         | 0.779          |
|                   | SAN          | 3        | 39.98±7.37     | 40.28         |                |
|                   | TNL          | 2        | 36.14±15.03    | 36.14         |                |
| <b>Group A</b>    | COM          | 7        | 66.01±5.01     | 65.29         | 0.055          |
|                   | SAN          | 4        | 73.96±1.52     | 74.02         |                |
|                   | TNL          | 6        | 70.11±12.51    | 71.61         |                |
| <b>Group B</b>    | COM          | 6        | 69.32±6.65     | 68.90         | 0.808          |
|                   | SAN          | 4        | 72.26±0.58     | 72.21         |                |
|                   | TNL          | 5        | 70.58±11.40    | 66.21         |                |
| <b>Group C</b>    | COM          | 4        | 57.05±         | 56.60         | 0.034*         |
|                   | SAN          | 3        | 75.15±         | 77.21         |                |
|                   | TNL          | 5        | 64.60±         | 64.86         |                |

**Table S4B**

| Time point     | Group | N | Mean±SD         | Median  | p value |
|----------------|-------|---|-----------------|---------|---------|
| <b>14 days</b> | COM   | 2 | 540.63±380.71   | 540.63  | 0.180   |
|                | SAN   | 3 | 890.44±263.17   | 935.69  |         |
|                | TNL   | 2 | 1270.99±202.35  | 1270.99 |         |
| <b>28 days</b> | COM   | 2 | 465.11±83.79    | 465.11  | 0.915   |
|                | SAN   | 3 | 744.10±429.32   | 828.70  |         |
|                | TNL   | 2 | 717.22±802.43   | 717.22  |         |
| <b>Group A</b> | COM   | 7 | 2554.11±538.42  | 2787.83 | 0.031*  |
|                | SAN   | 4 | 3422.87±119.39  | 3417.87 |         |
|                | TNL   | 6 | 3283.34±1488.99 | 3063.05 |         |
| <b>Group B</b> | COM   | 6 | 2951.59±638.20  | 3012.13 | 0.570   |
|                | SAN   | 4 | 3253.58±287.48  | 3308.44 |         |
|                | TNL   | 5 | 3133.37±970.56  | 2929.96 |         |
| <b>Group C</b> | COM   | 4 | 1856.61±707.41  | 1888.43 | 0.008*  |
|                | SAN   | 3 | 4003.70±489.05  | 4091.87 |         |
|                | TNL   | 5 | 2988.64±254.19  | 3048.67 |         |

**Table S4C**

| Time point     | Group | N | Mean±SD         | Median  | p value |
|----------------|-------|---|-----------------|---------|---------|
| <b>14 days</b> | COM   | 2 | 4667.92±72.57   | 4667.92 | 0.448   |
|                | SAN   | 3 | 4687.94±224.21  | 4592.54 |         |
|                | TNL   | 2 | 4831.82±264.20  | 4831.82 |         |
| <b>28 days</b> | COM   | 2 | 4807.52±140.19  | 4807.52 | 0.779   |
|                | SAN   | 3 | 4694.86±2220.75 | 4637.00 |         |
| <b>Group A</b> | TNL   | 2 | 4771.57±351.58  | 4771.57 | 0.032*  |
|                | COM   | 7 | 4890.57±205.59  | 4784.56 |         |
|                | SAN   | 4 | 5268.96±435.10  | 5144.81 |         |
|                | TNL   | 6 | 5506.16±671.61  | 5239.03 |         |
| <b>Group B</b> | COM   | 6 | 5104.88±255.11  | 5062.60 | 0.185   |
|                | SAN   | 4 | 5149.98±480.58  | 5145.84 |         |
|                | TNL   | 5 | 4837.54±198.33  | 4807.85 |         |
| <b>Group C</b> | COM   | 4 | 5039.95±334.92  | 4955.96 | 0.046*  |
|                | SAN   | 3 | 5771.90±248.94  | 5700.42 |         |
|                | TNL   | 5 | 5350.77±446.71  | 5201.17 |         |

**Table S5: Table representing the variations in percentage bone implant contact (BIC) of the three implants at different time points (14 days, 28 days, 4 months (Group A) preloaded, 3 months loaded (Group B) and 10 months loaded (Group C) obtained from  $\mu$ -CT analysis. \*  $p < 0.05$  is considered statistically significant.**

| Time point | Group | N | Mean $\pm$ SD     | Median | p value |
|------------|-------|---|-------------------|--------|---------|
| 14 days    | COM   | 2 | 33.22 $\pm$ 2.67  | 33.22  | 0.292   |
|            | SAN   | 3 | 30.19 $\pm$ 12.92 | 28.83  |         |
|            | TNL   | 2 | 45.01 $\pm$ 5.15  | 45.01  |         |
| 28 days    | COM   | 4 | 52.46 $\pm$ 7.97  | 52.56  | 0.618   |
|            | SAN   | 4 | 55.72 $\pm$ 6.20  | 53.77  |         |
|            | TNL   | 4 | 56.73 $\pm$ 6.21  | 55.59  |         |
| Group A    | COM   | 7 | 46.23 $\pm$ 12.22 | 47.18  | 0.553   |
|            | SAN   | 8 | 51.06 $\pm$ 17.45 | 57.21  |         |
|            | TNL   | 5 | 53.56 $\pm$ 14.17 | 52.73  |         |
| Group B    | COM   | 5 | 50.80 $\pm$ 4.63  | 53.38  | 0.284   |
|            | SAN   | 7 | 57.60 $\pm$ 6.43  | 56.72  |         |
|            | TNL   | 5 | 58.99 $\pm$ 15.20 | 57.11  |         |
| Group C    | COM   | 4 | 48.53 $\pm$ 13.91 | 45.57  | 0.231   |
|            | SAN   | 3 | 64.08 $\pm$ 10.14 | 60.20  |         |
|            | TNL   | 4 | 64.99 $\pm$ 10.41 | 62.03  |         |

**Table S6: Inflammatory response of COM, SAN and TNL after 10 months of loading assessed by histopathological evaluation of gingival tissue around the implant. \*  $p < 0.05$  is considered statistically significant.**

| <b>Histological features</b> | <b>Group</b> | <b>Grade 0</b> | <b>Grade 1</b> | <b>Grade 2</b> | <b>Grade 3</b> | <b>p value</b> |
|------------------------------|--------------|----------------|----------------|----------------|----------------|----------------|
| Inflammation                 | COM          | 0              | 0              | 2              | 2              | 0.355          |
|                              | TNL          | 0              | 2              | 1              | 1              |                |
|                              | SAN          | 0              | 2              | 0              | 2              |                |
| Foreign Body                 | COM          | 4              | 0              | 0              | 0              | -              |
|                              | TNL          | 4              | 0              | 0              | 0              |                |
|                              | SAN          | 4              | 0              | 0              | 0              |                |
| Connective Tissue            | COM          | 0              | 0              | 0              | 4              | 0.549          |
|                              | TNL          | 0              | 0              | 1              | 3              |                |
|                              | SAN          | 0              | 0              | 1              | 3              |                |
